# Supplementary material for: Hepatic cancer stem cell marker granulin-epithelin precursor and β-catenin expression associate with recurrence in hepatocellular carcinoma
Source: PubMed Central journal article supplement (PMC5008312; doi:10.18632/oncotarget.7803), 2016-03-01
Supplement: oncotarget-07-21644-s001.pdf [file oncotarget-07-21644-s001.pdf]

## SUPPLEMENTARY FIGURES AND TABLE

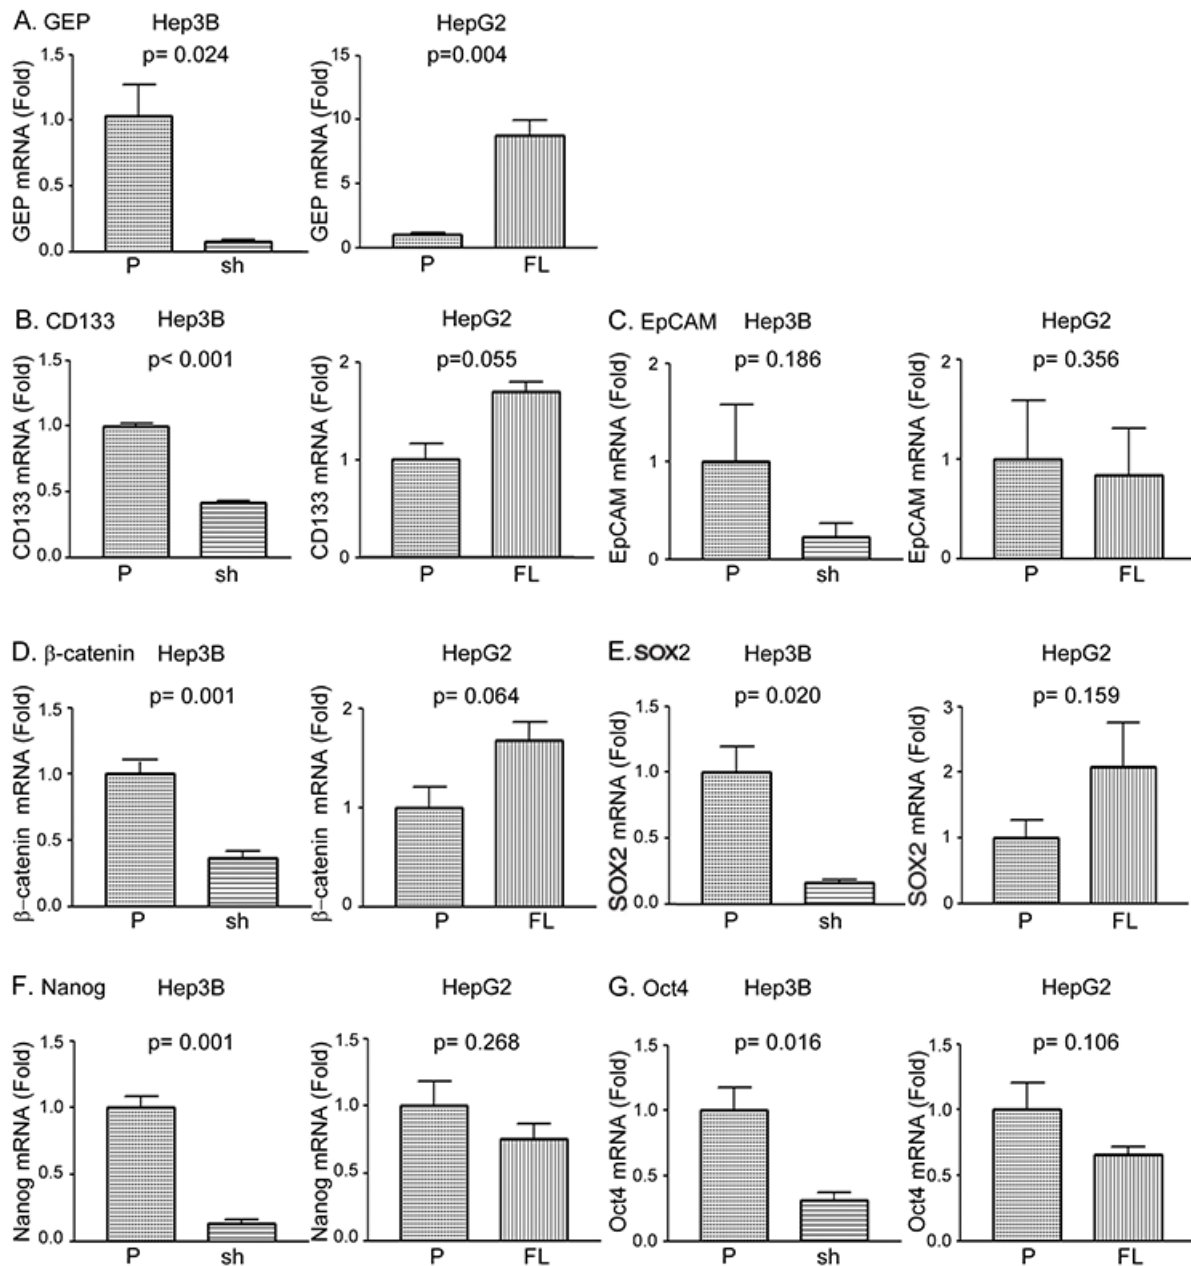

**Supplementary Figure S1: Effect of GEP modulation on the transcript expression levels of hepatic CSC markers and pluripotency-associated genes in HCC cell line models.** GEP expression was modulated by transfection in HCC cell lines Hep3B (P: parental Hep3B cells with high endogenous GEP levels; sh: GEP shRNA transfectants) and HepG2 (P: parental HepG2 cells with low endogenous GEP levels; FL: GEP full-length cDNA transfectants). **A.** GEP transcript level was significantly suppressed in Hep3B sh (left panel) compared to its parental cells P; while significantly over-expressed in HepG2 FL (right panel) compared to its parental cells P. **B–G.** Expressions of CD133, EpCAM,  $\beta$ -catenin, SOX2, Nanog and Oct4 in the GEP transfectants were quantified by RT-qPCR.

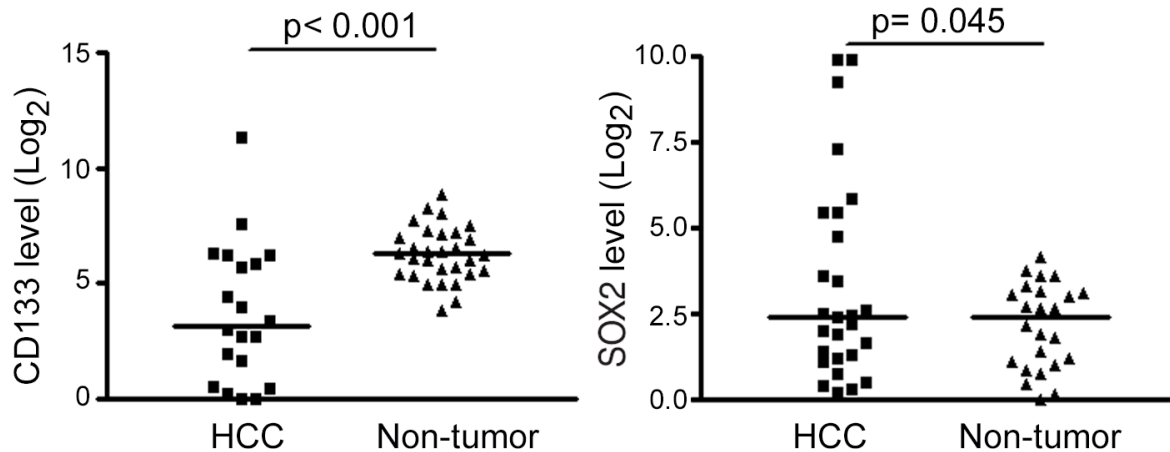

**Supplementary Figure S2: CD133 and SOX2 transcript levels in HCC clinical specimens.** CD133 and SOX2 transcript levels in HCC tumor (HCC, n = 30) and the paralleled tumor-adjacent non-tumor liver tissues (non-tumor, n = 30), with the lines indicating the median values.

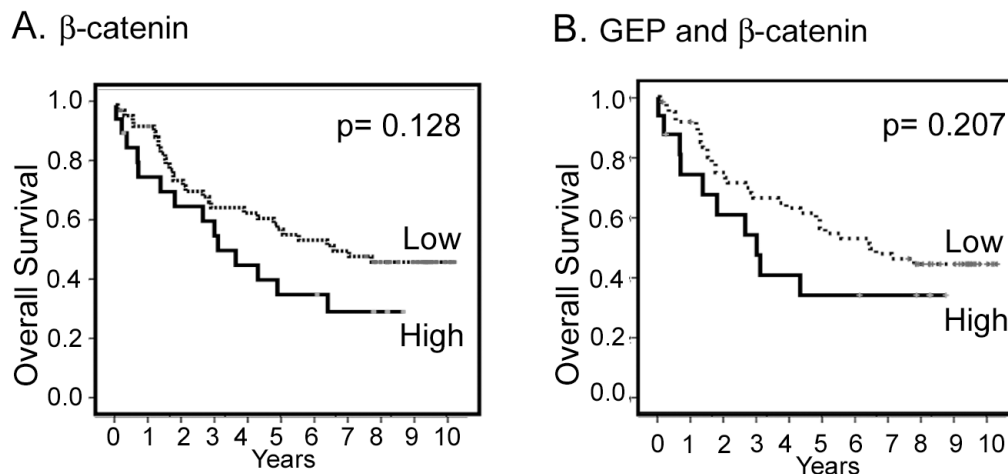

**Supplementary Figure S3: Clinical significance of GEP and β-catenin in HCC clinical specimens.** **A.** Kaplan–Meier overall survival plot according to β-catenin levels (log-rank test,  $p = 0.128$ ). There were 56 patients with low β-catenin expression and 21 patients with high β-catenin expression (median overall survival of 85.4 months and 43.9 months, respectively). **B.** Kaplan–Meier overall survival plot according to GEP and β-catenin levels (log-rank test,  $p = 0.207$ ). Patients (n = 77) were segregated into the low expression group (either one or both low in GEP and β-catenin) and the high expression group (both high in GEP and β-catenin). There were 61 patients in the low expression group (median overall survival, 77.6 months) and 16 patients in the high expression group (median overall survival, 36.1 months).

**Supplementary Table S1: Clinico-pathological features in relation to the viability of HCC cells isolated from clinical specimens**

| Clinico-pathological features                             | Cell viability <sup>^</sup> |      | P value      |
|-----------------------------------------------------------|-----------------------------|------|--------------|
|                                                           | low                         | high |              |
| <b>Age</b>                                                |                             |      |              |
| Young ( $\leq 60$ )                                       | 24                          | 22   | 0.822        |
| Elderly ( $> 60$ )                                        | 24                          | 20   |              |
| <b>Venous infiltration</b>                                |                             |      |              |
| Absent                                                    | 26                          | 12   | <b>0.014</b> |
| Present                                                   | 22                          | 30   |              |
| <b>HBV association</b>                                    |                             |      |              |
| Negative for HBsAg                                        | 16                          | 10   | 0.320        |
| Positive for HBsAg                                        | 32                          | 32   |              |
| <b>Cellular differentiation (Edmondson-Steiner grade)</b> |                             |      |              |
| Well-differentiated                                       | 40                          | 26   | <b>0.008</b> |
| Poorly-differentiated                                     | 5                           | 14   |              |
| <b>Tumor stage (version UICC7)</b>                        |                             |      |              |
| Early stage                                               | 28                          | 20   | 0.386        |
| Late stage                                                | 15                          | 16   |              |
| <b>Tumor size</b>                                         |                             |      |              |
| Small ( $\leq 5$ cm)                                      | 19                          | 10   | 0.110        |
| Large ( $> 5$ cm)                                         | 29                          | 32   |              |
| <b>Serum AFP level</b>                                    |                             |      |              |
| Low ( $\leq 400$ ng/ml)                                   | 35                          | 21   | <b>0.025</b> |
| High ( $> 400$ ng/ml)                                     | 13                          | 21   |              |
| <b>Number of tumor nodules</b>                            |                             |      |              |
| Single                                                    | 30                          | 26   | 0.954        |
| Multiple ( $\geq 2$ )                                     | 18                          | 16   |              |

<sup>^</sup>Cell viability was modeled as categorical variable and 70% viability as the cutoff.
